# Supplementary material for: Magnetic bead-based AuNP labelling combined with inductively coupled plasma mass spectrometry for sensitively and specifically counting cancer cells
Source: Royal Society of Chemistry journal article supplement (doi:10.1039/c5ja00364d), 2015-12-01
Supplement: c5ja00364d1.pdf [file c5ja00364d1.pdf]

**Supporting information for**

**Magnetic beads-based AuNPs labelling combined with inductively coupled  
plasma mass spectrometry for sensitively and specifically counting cancer cells**

WeiJuan Yang,<sup>a</sup> Zhiming Xi,<sup>a</sup> Xiaoxue Zeng,<sup>a</sup> Ling Fang,<sup>a</sup> Wenjing Jiang,<sup>a</sup> Yongning  
Wu,<sup>b</sup> LiangJun Xu<sup>a</sup> and FengFu Fu<sup>a\*</sup>

<sup>a</sup>Key Lab of Analysis and Detection for Food Safety of Ministry of Education, Fujian  
Provincial Key Lab of Analysis and Detection for Food Safety, College of Chemistry,  
Fuzhou University, Fuzhou, Fujian, 350116, China

<sup>b</sup>China National Center for Food Safety Risk Assessment, Beijing 100022, China

---

\* Corresponding author. Tel./Fax: +86-591-22866135; E-mail address: [fengfu@fzu.edu.cn](mailto:fengfu@fzu.edu.cn) (F.-F. Fu).

Table S1: Running Parameters of ICP-MS

| Parameter                 | Value                                 |
|---------------------------|---------------------------------------|
| RF power                  | 1400 W                                |
| Cool gas flow             | 15 L/min                              |
| Auxiliary gas flow        | 0.90 L/min                            |
| Nebulizer gas flow        | 0.80 L/min                            |
| Makeup gas rate           | 0.20 L/min                            |
| Torch                     | Non-shield torch                      |
| Cones                     | Nickel                                |
| Dwell times               | 10 ms                                 |
| Resolution                | Standard                              |
| Analogue detector voltage | 2900 V                                |
| PC detector voltage       | 1750 V                                |
| Monitored isotope(m/z)    | <sup>197</sup> Au                     |
| Nebulizer type            | MCN (optimum flow is 50 - 200 μL/min) |

Table S2: Comparison on the analytical performance among several previous methods and this study.

| Assay method                                                                          | Detection limit                           | Analysis time   | Ref.       |
|---------------------------------------------------------------------------------------|-------------------------------------------|-----------------|------------|
| Polymerase chain reaction (PCR)-based method                                          | 2 mL of blood ( $1 \times 10^6$ cells/mL) | Two days        | [1]        |
| Colorimetric method based on platinum nanoparticles                                   | 125 cells                                 | Dozens of hours | [2]        |
| Colorimetric aptasensor based on cell-triggered cyclic enzymatic signal amplification | 40 cells                                  | Dozens of hours | [3]        |
| Colorimetric method based on gold nanoparticles                                       | 200 cells                                 | Several hours   | [4]        |
| Aptamer-based electrochemical method                                                  | 100 cells                                 | Several hours   | [5]        |
| Fluorescent aptasensor based on graphene oxide                                        | 200 cells                                 | Several hours   | [6]        |
| Gold nanoparticles-tag combined with ICP-MS                                           | 100 cells                                 | 3 hours         | This study |

## REFERENCES

- [1] Schamhart, D., Swinnen, J., Kurth, K.-H., Westerhof, A., Kusters, R., Borchers, H., Sternberg, C., 2003. *Clin. Chem.* 49, 1458-1466.
- [2] Zhang, L.N., Deng, H.H., Lin, F.L., Xu, X.W., Weng, S.H., Liu, A.L., Lin, X.H., Xia, X.H., Chen, W., 2014. *Anal. Chem.* 86, 2711-2718.
- [3] Zhang, X., Xiao, K., Cheng, L., Chen, H., Liu, B., Zhang, S., Kong, J., 2014b. *Anal. Chem.* 86, 5567-5572.
- [4] Medley, C.D., Smith, J.E., Tang, Z., Wu, Y., Bamrungsap, S., Tan, W., 2008. *Anal. Chem.* 80, 1067-1072.
- [5] Zhang, K., Tan, T., Fu, J.J., Zheng, T., Zhu, J.J., 2013. *Analyst* 138, 6323-6330.
- [6] Xie, Q., Tan, Y., Guo, Q., Wang, K., Yuan, B., Wan, J., Zhao, X., 2014. *Anal. Methods* 6, 6809.

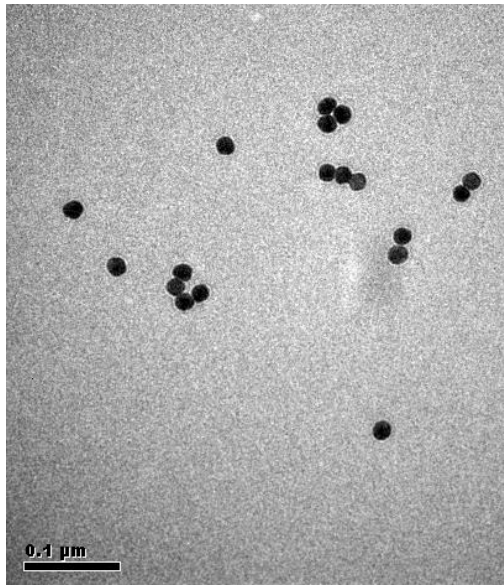

Figure S1: The TEM image of citrate-stabilized AuNPs used in the experiment.

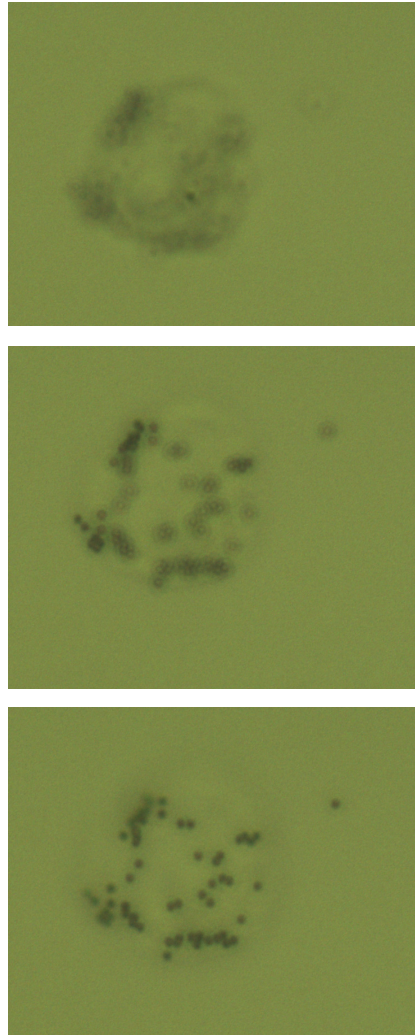

Figure S2: The optical microscope image of a single SMMC-7721 cell, which has interacted with MBs-aptamer-C<sub>p</sub>-AuNPs-A<sub>p</sub>-AuNPs conjugates, observed in different focal distance.

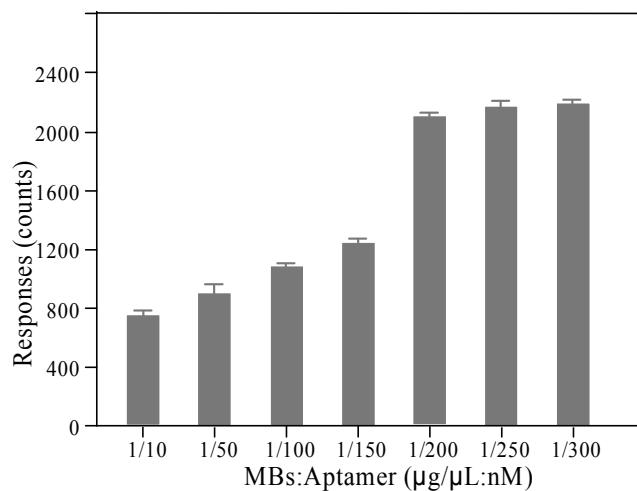

Figure S3: Effect of the ratio of MBs and aptamer DNA (MBs/Aptamer) on the ICP-MS signals. The ratios of MBs to aptamers were 1:10, 1:50, 1:100, 1:150, 1:200, 1:250, 1:300 (μg/μL:nM) respectively, the concentration of SMMC-7721 was 1000 cells/mL.

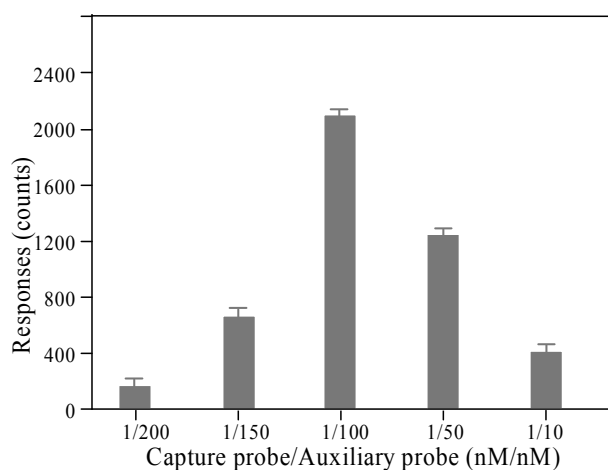

Figure S4: Effect of the ratio of capture probe and auxiliary probe ( $C_p/A_p$ ) on the ICP-MS signals. The ratios of capture probe and auxiliary probe ( $C_p/A_p$ ) were 1:10, 1:50, 1:100, 1:150, 1:200 (molar ratio) respectively, the concentration of SMMC-7721 was 1000 cells/mL.
